# Supplementary material for: Nicotine dependence as a risk factor for upper aerodigestive tract (UADT) cancers: A mediation analysis
Source: PubMed Central journal article supplement (PMC7454981; doi:10.1371/journal.pone.0237723), 2020-08-28
Supplement: pone.0237723.s001.pdf [file pone.0237723.s001.pdf]

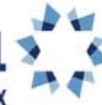

\*«PatientID»\*

«PatientID»

**Thank you for completing this questionnaire.**

Multicancer Case-control Study

Samuel Lunenfeld Research Institute, Mount Sinai Hospital

60 Murray St., Box 18, Toronto, ON M5T 3L9 416-586-4800 ext. 8134

*(Office use only)* Form collected by:

---

# Multicancer Case-Control Study

## Health Questionnaire

Today's Date:

|                      |                      |                      |                      |   |                      |                      |   |                      |                      |
|----------------------|----------------------|----------------------|----------------------|---|----------------------|----------------------|---|----------------------|----------------------|
| <input type="text"/> | <input type="text"/> | <input type="text"/> | <input type="text"/> | / | <input type="text"/> | <input type="text"/> | / | <input type="text"/> | <input type="text"/> |
| <i>Year</i>          |                      |                      |                      |   | <i>month</i>         |                      |   | <i>day</i>           |                      |

Date of birth:

|                      |                      |                      |                      |   |                      |                      |
|----------------------|----------------------|----------------------|----------------------|---|----------------------|----------------------|
| <input type="text"/> | <input type="text"/> | <input type="text"/> | <input type="text"/> | / | <input type="text"/> | <input type="text"/> |
| <i>Year</i>          |                      |                      |                      |   | <i>month</i>         |                      |

Gender:

Male  Female

Please answer the following questions about your health now and in the past and about some of your habits and medication use. This information will be kept strictly confidential and will only be used for medical research purposes as specified on the consent form.

**PART A. General Demographic and Health Information**

1. What is your current **weight**? \_\_\_\_\_lb OR \_\_\_\_\_kg
2. What was your **weight when you were 25 years old**? \_\_\_\_\_lb OR \_\_\_\_\_kg
3. What is your current **height**? \_\_\_\_\_ft \_\_\_\_\_in OR \_\_\_\_\_cm
4. (a) In what occupation have you worked the longest during your adult life?  
\_\_\_\_\_
- (b) What were your usual activities and duties in this occupation?  
\_\_\_\_\_
- (c) How many years have you worked in this occupation? \_\_\_\_\_ years.
5. Up until the past year, you would say your health was:  
 Excellent  Very Good  Good  Fair  Poor
6. Race:  
 White/Caucasian  Black/African-Canadian  Asian/Pacific Islander  
 First Nations  Latino/Hispanic  Mixed, specify \_\_\_\_\_  
 Other, specify \_\_\_\_\_
7. Highest level of education completed:  
 Elementary School  Some High School  High School Graduate  
 Vocational/Technical  College/University  Graduate/Professional School  
 Other \_\_\_\_\_
8. How many years of education have you completed (starting from elementary school)?  
\_\_\_\_\_ years
9. What is your current marital status?  
 Single  Separated  Divorced  Married or living with partner  Widowed

**PART I. Reproductive History [for women only]**

1. At what age did your menstrual periods begin? \_\_\_\_\_ years old
2. Have you completely stopped having menstrual periods?  
 No  Yes → at what age? \_\_\_\_\_ years old
3. (a) Have you ever been pregnant?  
 No → please go to question I.4.  Yes
- (b) If yes to (a), how many times? \_\_\_\_\_ #; and (c) how many live births have you had? \_\_\_\_\_ #
- (d) If yes to (a), when was your first pregnancy? \_\_\_\_\_ years old
4. (a) Have you ever used birth control pills for more than 1 year?  
 No → please go to question I.5.  Yes
- (b) If yes to (a), when did you first start taking it? At \_\_\_\_\_ years old;
- (c) If yes to (a), for how many years did you take them? (not counting any time that you stopped for more than 6 months) \_\_\_\_\_ years
5. Have you had an operation to remove your uterus?  
 No  Yes, at what age? \_\_\_\_\_ years old
6. Have you had an operation to remove both of your ovaries?  
 No  Yes, at what age? \_\_\_\_\_ years old

**PART H. Asbestos Exposure**

1. Have you ever been exposed to asbestos?

- No → go to the next page.
- Yes, continue.
- Don't know.

(a) If yes, how often were you exposed?

- Once or twice
- For less than 3 months
- Between 3-6 months
- For more than 6 months

(b) When were you exposed?

From the age of \_\_\_\_\_ years to the age of \_\_\_\_\_ years

(c) Where did the exposure happen?

- At home
- At work; Fill in job name/type below.
- Both; Fill in job name/type \_\_\_\_\_

(d) Was the asbestos:  intact or sealed? OR/AND  loose and flaky?

(e) If you worked directly with asbestos, please describe your activities (i.e.

spraying, applying, cutting, removing):

\_\_\_\_\_

(f) What type of asbestos were you in contact with?

- Serpentine/Crysotile (white)
- Amphiboles (brown/off-white)
- Crocidolite (blue)
- Unknown

(g) Did you wear any personal protective gear (e.g. mask)?

- No
- Yes, from \_\_\_\_\_ (year) to \_\_\_\_\_ (year)

(h) If yes to (g), did you wear this gear appropriately?

- >50% of the time
- <50% of the time
- Never

(i) Did you work in areas where other workers were generating asbestos dust?

- No
- Yes

Describe: \_\_\_\_\_

**PART B. Alcohol**

1. Have you ever had a drink of alcohol **at least once per week for 1 year** or longer?

- No
- Yes → please fill in table chronologically:

| (a) From Age (years) | (b) To Age (years) | (c) Beer (cans or bottles/week) | (d) Wine (6-ounce glasses/week) | (e) Spirit or hard liquor (ounces/week) |
|----------------------|--------------------|---------------------------------|---------------------------------|-----------------------------------------|
|                      |                    | cans/bottles                    | glasses                         | ounces                                  |
|                      |                    | cans/bottles                    | glasses                         | ounces                                  |
|                      |                    | cans/bottles                    | glasses                         | ounces                                  |
|                      |                    | cans/bottles                    | glasses                         | ounces                                  |

2. Do you currently drink alcohol at least once per week?

- No → Stopped at \_\_\_\_\_ years old
- Yes

**PART C. Smoking**

1. Have you smoked more than 100 **cigarettes** in your lifetime?

- No → please go to question C.4.
- Yes

2. If you have smoked more than 100 **cigarettes** in your lifetime, when did you start smoking *regularly*? \_\_\_\_\_ years old

(a) Have you stopped smoking **cigarettes now**?

- No
- Yes → (b) When did you last smoke cigarettes? \_\_\_\_\_ / \_\_\_\_\_ OR  
At \_\_\_\_\_ years old Month / Year

3. **Please answer the following questions based on the average situation during the period when you smoked.**

- (a) On average, about how many **cigarettes** do / did you smoke each day?  
 \_\_\_\_\_ cigarettes per day
- (b) How soon after you wake up do / did you smoke your first cigarette?  
 after 60 minutes  
 31-60 minutes  
 6-30 minutes  
 within 5 minutes
- (c) Do / did you find it difficult to refrain from smoking in places where it is forbidden. e.g. in a hospital or on a bus?  
 No  Yes
- (d) Which cigarette would you hate most to give up?  
 The first in the morning  Any other
- (e) Do / did you smoke more frequently during the first hours after waking than the rest of the day?  
 No  Yes
- (f) Do / did you smoke when you are so ill that you are in bed most of the day?  
 No  Yes
- (g) Have you ever tried to quit smoking?  
 No  Yes → How many times? \_\_\_\_\_ times

4. (a) Have you ever smoked **cigars at least once a week for 1 year** or longer?  
 No → please go to question C.5.  Yes
- (b) **If yes**, average number of cigars per week \_\_\_\_\_; Start date \_\_\_\_\_/\_\_\_\_\_/\_\_\_\_\_  
 AGE \_\_\_\_\_ years old month / year
- (c) Do you still smoke cigars now?  
 No → Stop date \_\_\_\_\_/\_\_\_\_\_/\_\_\_\_\_  
 OR AGE \_\_\_\_\_ years old  
 Yes

| 6. Other systems<br>Have you ever had or been diagnosed by a medical professional as having:           | NO                       | DON'T KNOW               | YES (If yes, at what age?)                  |
|--------------------------------------------------------------------------------------------------------|--------------------------|--------------------------|---------------------------------------------|
| Diabetes                                                                                               | <input type="checkbox"/> | <input type="checkbox"/> | <input type="checkbox"/> At _____ years old |
| Kidney complications due to the diabetes?                                                              | <input type="checkbox"/> | <input type="checkbox"/> | <input type="checkbox"/> At _____ years old |
| Polycythemia Vera (a specific blood disease)                                                           | <input type="checkbox"/> | <input type="checkbox"/> | <input type="checkbox"/> At _____ years old |
| AIDS / HIV positive                                                                                    | <input type="checkbox"/> | <input type="checkbox"/> | <input type="checkbox"/> At _____ years old |
| Tuberculosis                                                                                           | <input type="checkbox"/> | <input type="checkbox"/> | <input type="checkbox"/> At _____ years old |
| Malaria                                                                                                | <input type="checkbox"/> | <input type="checkbox"/> | <input type="checkbox"/> At _____ years old |
| Kidney problems, Specify _____                                                                         | <input type="checkbox"/> | <input type="checkbox"/> | <input type="checkbox"/> At _____ years old |
| Gallstones                                                                                             | <input type="checkbox"/> | <input type="checkbox"/> | <input type="checkbox"/> At _____ years old |
| Cholecystitis or gall bladder problems                                                                 | <input type="checkbox"/> | <input type="checkbox"/> | <input type="checkbox"/> At _____ years old |
| Eczema                                                                                                 | <input type="checkbox"/> | <input type="checkbox"/> | <input type="checkbox"/> At _____ years old |
| Drug Allergies, Specify _____                                                                          | <input type="checkbox"/> | <input type="checkbox"/> | <input type="checkbox"/> At _____ years old |
| Non-drug Allergies, Specify _____                                                                      | <input type="checkbox"/> | <input type="checkbox"/> | <input type="checkbox"/> At _____ years old |
| Peripheral vascular disease (blocked arteries in your legs/poor circulation causing purple feet/hands) | <input type="checkbox"/> | <input type="checkbox"/> | <input type="checkbox"/> At _____ years old |

| 7. Other infection history (serious infections that lasted for at least 1 month, OR required treatment or medication for at least 1 month) |                  |                                                                         |                       |
|--------------------------------------------------------------------------------------------------------------------------------------------|------------------|-------------------------------------------------------------------------|-----------------------|
| Name of the infection/disease                                                                                                              | Age at diagnosis | Was it treated? If YES, what was the treatment?                         | Duration of treatment |
|                                                                                                                                            |                  | <input type="checkbox"/> No <input type="checkbox"/> Yes, specify _____ | months                |
|                                                                                                                                            |                  | <input type="checkbox"/> No <input type="checkbox"/> Yes, specify _____ | months                |

8. Do you have other ailments not mentioned above?  
 \_\_\_\_\_
9. Do you have more comments to make about your health?  
 \_\_\_\_\_

|                                                                  |                                                                                                                                                                                                                                                                                    |
|------------------------------------------------------------------|------------------------------------------------------------------------------------------------------------------------------------------------------------------------------------------------------------------------------------------------------------------------------------|
| Have you ever had regurgitation?                                 | <input type="checkbox"/> No → please go to question G.4.<br><input type="checkbox"/> Don't know →<br><input type="checkbox"/> Yes , At _____ years old                                                                                                                             |
| At its worst in your life, how often did you have regurgitation? | <input type="checkbox"/> Less than once a month <input type="checkbox"/> At least once a month<br><input type="checkbox"/> At least once a week<br><input type="checkbox"/> 3-4 times a week <input type="checkbox"/> More than 4 times a week <input type="checkbox"/> Don't know |
| How often was the regurgitation at night?                        | <input type="checkbox"/> Less than once a month <input type="checkbox"/> At least once a month<br><input type="checkbox"/> At least once a week<br><input type="checkbox"/> 3-4 times a week <input type="checkbox"/> More than 4 times a week <input type="checkbox"/> Don't know |
| How long have you had symptoms of regurgitation? _____ years     |                                                                                                                                                                                                                                                                                    |

| 4. Muscle, Joints and Bones<br>Have you ever had or been diagnosed by a medical professional as having: | NO                       | DON'T KNOW               | YES (If yes, at what age?)                  |
|---------------------------------------------------------------------------------------------------------|--------------------------|--------------------------|---------------------------------------------|
| Rheumatoid arthritis (This is not Osteoarthritis)                                                       | <input type="checkbox"/> | <input type="checkbox"/> | <input type="checkbox"/> At _____ years old |
| Lupus (SLE), Scleroderma, Sjogrens or Connective tissue disease                                         | <input type="checkbox"/> | <input type="checkbox"/> | <input type="checkbox"/> At _____ years old |
| Other arthritis, Specify _____                                                                          | <input type="checkbox"/> | <input type="checkbox"/> | <input type="checkbox"/> At _____ years old |
| Gout                                                                                                    | <input type="checkbox"/> | <input type="checkbox"/> | <input type="checkbox"/> At _____ years old |

| 5. Brain System<br>Have you ever had or been diagnosed by a medical professional as having (a): | NO                       | DON'T KNOW               | YES (If yes, at what age?)                  |
|-------------------------------------------------------------------------------------------------|--------------------------|--------------------------|---------------------------------------------|
| Stroke                                                                                          | <input type="checkbox"/> | <input type="checkbox"/> | <input type="checkbox"/> At _____ years old |
| Depression                                                                                      | <input type="checkbox"/> | <input type="checkbox"/> | <input type="checkbox"/> At _____ years old |
| Transient ischemic attack (TIA) or mini-stroke                                                  | <input type="checkbox"/> | <input type="checkbox"/> | <input type="checkbox"/> At _____ years old |
| Alzheimer's Disease (dementia)                                                                  | <input type="checkbox"/> | <input type="checkbox"/> | <input type="checkbox"/> At _____ years old |

5. (a) Have you ever smoked a **pipe at least once a week for 1 year** or longer?
- No → please go to question C.6.  
 Yes
- (b) **If yes**, how many ounces/week \_\_\_\_\_ ; Start date \_\_\_\_ / \_\_\_\_ OR AGE \_\_\_\_  
 Month Year
- (c) Do you still smoke a pipe now?
- No → Stop date \_\_\_\_\_ / \_\_\_\_\_ OR AGE \_\_\_\_\_ years old  
 month year  
 Yes
6. **Have you ever used:**   **Never**   **Occasionally**   **Regularly**   **If yes, age when started?**
- (a) Chewing tobacco?            \_\_\_\_\_ years
- (b) Snuff?            \_\_\_\_\_ years
7. (a) At any time in your life, have you been around **someone else's tobacco smoke at least once per week for 1 year or longer?**    No    Yes → please fill in table:

| (b) Where have you been around someone else's tobacco smoke? (check all that apply)                                                      | (c) On average, how often were you around other people's smoke?                                                                                                                                            | (d) On average, how many hours of exposure did you encounter for each day you were exposed?                                                        | (e) How many years were you exposed in total? |
|------------------------------------------------------------------------------------------------------------------------------------------|------------------------------------------------------------------------------------------------------------------------------------------------------------------------------------------------------------|----------------------------------------------------------------------------------------------------------------------------------------------------|-----------------------------------------------|
| <input type="checkbox"/> At home?<br><input type="checkbox"/> At work?<br><input type="checkbox"/> At leisure? (visiting friends, bars)? | <input type="checkbox"/> Daily<br><input type="checkbox"/> At least 4 days/week but not everyday<br><input type="checkbox"/> 1-3 days/week<br><input type="checkbox"/> Occasionally (less than 1 day/week) | <input type="checkbox"/> <2 hours<br><input type="checkbox"/> 2-4 hours<br><input type="checkbox"/> 4-6 hours<br><input type="checkbox"/> >6 hours | # _____ years                                 |

8. In your lifetime, you have considered your **second-hand smoke exposure** to be:
- light  
 moderate  
 heavy

The next question is about marijuana. Please remember that your answers will remain strictly confidential

9. Have you ever used or tried marijuana, cannabis or hashish?

- No, Don't know or refuse → Please go to Part D: Family History
- Yes, just once →
- Yes, more than once → Please fill in table below

|     | From Age (years) | To Age (years) | Quantity of Use                                 | Mode (please circle) | Type (please circle) |
|-----|------------------|----------------|-------------------------------------------------|----------------------|----------------------|
| i   |                  |                | # _____ per day/week/month/year (please circle) | Joints/pipes/bongs   | Number/ounces/hits   |
| ii  |                  |                | # _____ per day/week/month/year (please circle) | Joints/pipes/bongs   | Number/ounces/hits   |
| iii |                  |                | # _____ per day/week/month/year (please circle) | Joints/pipes/bongs   | Number/ounces/hits   |

| <b>3. Digestive System</b> - The following questions are about your digestive system. |                          |                          |                                                                                                                                                                                                                                                                                                                                                              |
|---------------------------------------------------------------------------------------|--------------------------|--------------------------|--------------------------------------------------------------------------------------------------------------------------------------------------------------------------------------------------------------------------------------------------------------------------------------------------------------------------------------------------------------|
| Have you ever had or been diagnosed by a medical professional as having:              | NO                       | DON'T KNOW               | YES (If yes, at what age?)                                                                                                                                                                                                                                                                                                                                   |
| Hiatus hernia                                                                         | <input type="checkbox"/> | <input type="checkbox"/> | <input type="checkbox"/> At _____ years old                                                                                                                                                                                                                                                                                                                  |
| Jaundice                                                                              | <input type="checkbox"/> | <input type="checkbox"/> | <input type="checkbox"/> At _____ years old                                                                                                                                                                                                                                                                                                                  |
| Stomach ulcer or peptic ulcer proven by a test                                        | <input type="checkbox"/> | <input type="checkbox"/> | <input type="checkbox"/> At _____ years old                                                                                                                                                                                                                                                                                                                  |
| Hepatitis                                                                             | <input type="checkbox"/> | <input type="checkbox"/> | <input type="checkbox"/> If yes, what types?<br><input type="checkbox"/> Hep. A, At _____ years old; <input type="checkbox"/> Hep. B, At _____ years old;<br><input type="checkbox"/> Hep. C, At _____ years old; <input type="checkbox"/> Other hepatitis, specify _____, At _____ year old;<br><input type="checkbox"/> Don't know, but at _____ years old |
| Barrett's esophagus                                                                   | <input type="checkbox"/> | <input type="checkbox"/> | <input type="checkbox"/> At _____ years old                                                                                                                                                                                                                                                                                                                  |
| Liver disease, Specify _____                                                          | <input type="checkbox"/> | <input type="checkbox"/> | <input type="checkbox"/> At _____ years old                                                                                                                                                                                                                                                                                                                  |
| H. Pylori infection (bacteria that causes ulcers)                                     | <input type="checkbox"/> | <input type="checkbox"/> | <input type="checkbox"/> At _____ years old                                                                                                                                                                                                                                                                                                                  |
| Ulcerative colitis/Crohn's disease                                                    | <input type="checkbox"/> | <input type="checkbox"/> | <input type="checkbox"/> At _____ years old                                                                                                                                                                                                                                                                                                                  |
| Diseases of the pancreas other than diabetes                                          | <input type="checkbox"/> | <input type="checkbox"/> | <input type="checkbox"/> At _____ years old                                                                                                                                                                                                                                                                                                                  |
| Gastrointestinal hemorrhage/ bleeding from the digestive system                       | <input type="checkbox"/> | <input type="checkbox"/> | <input type="checkbox"/> At _____ years old                                                                                                                                                                                                                                                                                                                  |

|                                                              |                                                                                                                                                                                                                                                                                    |
|--------------------------------------------------------------|------------------------------------------------------------------------------------------------------------------------------------------------------------------------------------------------------------------------------------------------------------------------------------|
| Have you ever had heartburn?                                 | <input type="checkbox"/> No → please go to next table about regurgitation.<br><input type="checkbox"/> Don't know →<br><input type="checkbox"/> Yes , At _____ years old                                                                                                           |
| At its worst in your life, how often did you have heartburn? | <input type="checkbox"/> Less than once a month <input type="checkbox"/> At least once a month<br><input type="checkbox"/> At least once a week<br><input type="checkbox"/> 3-4 times a week <input type="checkbox"/> More than 4 times a week <input type="checkbox"/> Don't know |
| How often was the heartburn at night?                        | <input type="checkbox"/> Less than once a month <input type="checkbox"/> At least once a month<br><input type="checkbox"/> At least once a week<br><input type="checkbox"/> 3-4 times a week <input type="checkbox"/> More than 4 times a week <input type="checkbox"/> Don't know |
| How long have you had symptoms of heartburn?                 | _____ years                                                                                                                                                                                                                                                                        |

**PART G. Other Health Conditions**

The following questions are about problems you may have had in the past. For those conditions that you have ever had, please specify at what age you were first told by a medical professional about it?

| <b>1. Lung System</b> – The following questions are about your lungs.    |                             |                              |                                                       |
|--------------------------------------------------------------------------|-----------------------------|------------------------------|-------------------------------------------------------|
| Have you ever had or been diagnosed by a medical professional as having: | <b>NO</b>                   | <b>DON'T KNOW</b>            | <b>YES</b> (If yes, at what age?)                     |
| Asbestosis                                                               | <input type="checkbox"/>    | <input type="checkbox"/>     | <input type="checkbox"/> At ____ years old            |
| If yes, has it been treated?                                             | <input type="checkbox"/> No | <input type="checkbox"/> Yes | If yes, in what year? _____                           |
| Pleural plaques                                                          | <input type="checkbox"/>    | <input type="checkbox"/>     | <input type="checkbox"/> At ____ years old            |
| If yes, has it been treated?                                             | <input type="checkbox"/> No | <input type="checkbox"/> Yes | If it has been biopsied, what were the results? _____ |
| Shortness of breath climbing one flight of stairs                        | <input type="checkbox"/>    | <input type="checkbox"/>     | <input type="checkbox"/> At ____ years old            |
| Pneumonia                                                                | <input type="checkbox"/>    | <input type="checkbox"/>     | <input type="checkbox"/> At ____ years old            |
| Chronic Bronchitis/COPD/Chronic Obstructive Pulmonary Disease            | <input type="checkbox"/>    | <input type="checkbox"/>     | <input type="checkbox"/> At ____ years old            |
| Emphysema                                                                | <input type="checkbox"/>    | <input type="checkbox"/>     | <input type="checkbox"/> At ____ years old            |

| <b>2. Heart System</b> – The following questions are about your heart.   |                          |                          |                                            |
|--------------------------------------------------------------------------|--------------------------|--------------------------|--------------------------------------------|
|                                                                          | <b>NO</b>                | <b>DON'T KNOW</b>        | <b>YES</b> (If yes, at what age?)          |
| Have you ever seen a cardiologist (heart specialist)?                    | <input type="checkbox"/> | <input type="checkbox"/> | <input type="checkbox"/> At ____ years old |
| Have you ever had investigations or tests done for your heart?           | <input type="checkbox"/> | <input type="checkbox"/> | <input type="checkbox"/> At ____ years old |
| Have you ever had a coronary artery bypass surgery?                      | <input type="checkbox"/> | <input type="checkbox"/> | <input type="checkbox"/> At ____ years old |
| <b>Have you ever been diagnosed by a medical professional as having:</b> |                          |                          |                                            |
| High blood pressure (hypertension)                                       | <input type="checkbox"/> | <input type="checkbox"/> | <input type="checkbox"/> At ____ years old |
| High cholesterol                                                         | <input type="checkbox"/> | <input type="checkbox"/> | <input type="checkbox"/> At ____ years old |
| Heart failure                                                            | <input type="checkbox"/> | <input type="checkbox"/> | <input type="checkbox"/> At ____ years old |
| Angina (chest pain from the heart)                                       | <input type="checkbox"/> | <input type="checkbox"/> | <input type="checkbox"/> At ____ years old |
| Heart attack (myocardial infarction)                                     | <input type="checkbox"/> | <input type="checkbox"/> | <input type="checkbox"/> At ____ years old |
| Angioplasty                                                              | <input type="checkbox"/> | <input type="checkbox"/> | <input type="checkbox"/> At ____ years old |
| Irregular heart rhythm (arrhythmia)                                      | <input type="checkbox"/> | <input type="checkbox"/> | <input type="checkbox"/> At ____ years old |

**PART D: Family History**

1. How many siblings do you have?  
 \_\_\_\_\_ # sisters    \_\_\_\_\_ # brothers    \_\_\_\_\_ # half-sisters    \_\_\_\_\_ # half-brothers

2. How many biological children do you have? \_\_\_\_\_ # daughters    \_\_\_\_\_ # sons

3. Please list each blood-related mother, father, daughter, son, brother or sister that has ever had cancer.

None

| Relation | Type of cancer | Age at diagnosis | Alive? (Yes/No) | Did this person ever smoke? |
|----------|----------------|------------------|-----------------|-----------------------------|
|          |                |                  |                 |                             |
|          |                |                  |                 |                             |
|          |                |                  |                 |                             |

4. Please list each blood-related mother, father, daughter, son, brother or sister that has ever had any **LIVER DISEASES**, for example Hepatitis A, B, C, cirrhosis, cholecystitis, gallstones, cholecyst disease or other liver diseases (liver cancer should be listed above)

None

| Relation | Type of liver disease | Age at diagnosis |
|----------|-----------------------|------------------|
|          |                       |                  |
|          |                       |                  |
|          |                       |                  |

5. Please list ANY of your blood-related relatives who been diagnosed with **PANCREATITIS**?

None

| Relation | Age at diagnosis | Number of bouts of pain | Number of years affected |
|----------|------------------|-------------------------|--------------------------|
|          |                  |                         |                          |
|          |                  |                         |                          |
|          |                  |                         |                          |

6. Please list ANY of your blood-related relatives who been diagnosed with **DIABETES**?

None

| Relation | Type of diabetes (if known)<br>(e.g. Type 1/Juvenile, Type 2/Diabetes mellitus) | Age at diagnosis |
|----------|---------------------------------------------------------------------------------|------------------|
|          |                                                                                 |                  |
|          |                                                                                 |                  |
|          |                                                                                 |                  |

**PART E. Past Cancer History**

1. Please fill in the table below if **you** have ever been **diagnosed with any type of cancer** (please list all cancers including leukemia, lymphoma, and skin cancers like melanoma, basal cell or squamous cell skin cancer):

| Type of Cancer<br>(e.g. Breast, lung, etc.) | Date of Diagnosis<br>(month and year) | Type of Treatment (e.g. surgery, radiation, chemotherapy) | Duration of treatment<br>(months) |
|---------------------------------------------|---------------------------------------|-----------------------------------------------------------|-----------------------------------|
|                                             |                                       |                                                           |                                   |
|                                             |                                       |                                                           |                                   |

2. (a) Have you ever had radiation treatment for a medical problem?

No

Yes → please fill in table:

| (b) From age | To age | For what conditions? | Which part of your body was treated? |
|--------------|--------|----------------------|--------------------------------------|
|              |        |                      |                                      |
|              |        |                      |                                      |

3. **[For women only]**

(a) Have you ever had a mammogram?

No → please go to **PART F**.

Yes → (b) How many mammograms? \_\_\_\_\_#

(c) How old were you when you had your first mammogram?  
\_\_\_\_\_ years old

**PART F. History of Aspirin Usage**

1. Have you ever taken **aspirin** or **aspirin-like drugs** such as ibuprofen or Motrin **at least once per week for 6 months** or longer in any period of time during your life?

No

Yes → please fill in table

| Check those that apply                                                              | Age started (years) | Age stopped (years) | Average amount taken per week during this period |                                      |                          | Total number of years taken |
|-------------------------------------------------------------------------------------|---------------------|---------------------|--------------------------------------------------|--------------------------------------|--------------------------|-----------------------------|
|                                                                                     |                     |                     | Once a week                                      | A few times a week, but not everyday | At least once a day      |                             |
| <input type="checkbox"/> Aspirin                                                    |                     |                     | <input type="checkbox"/>                         | <input type="checkbox"/>             | <input type="checkbox"/> | _____ years                 |
|                                                                                     |                     |                     | <input type="checkbox"/>                         | <input type="checkbox"/>             | <input type="checkbox"/> |                             |
|                                                                                     |                     |                     | <input type="checkbox"/>                         | <input type="checkbox"/>             | <input type="checkbox"/> |                             |
| <input type="checkbox"/> Naprosyn, Ibuprofen, Motrin or similar drugs called NSAIDS |                     |                     | <input type="checkbox"/>                         | <input type="checkbox"/>             | <input type="checkbox"/> | _____ years                 |
|                                                                                     |                     |                     | <input type="checkbox"/>                         | <input type="checkbox"/>             | <input type="checkbox"/> |                             |
|                                                                                     |                     |                     | <input type="checkbox"/>                         | <input type="checkbox"/>             | <input type="checkbox"/> |                             |
